# Supplementary material for: Development of a new automated clean-up system for the simultaneous analysis of polychlorinated dibenzo-p-dioxins (PCDDs), dibenzofurans (PCDFs) and ‘dioxin-like’ polychlorinated biphenyls (dl-PCB) in flue gas emissions by GPC-SPE
Source: Royal Society of Chemistry journal article supplement (doi:10.1039/c2em10881j), 2012-01-01
Supplement: c2em10881j.pdf [file c2em10881j.pdf]

**Table 3 - PCDD/Fs concentrations in “certified” fly ash samples (13<sup>th</sup> Intercal); triplicate analysis**

|       | Congeners           | Certified concentrations |      |            | Conc. in this study |       |             |
|-------|---------------------|--------------------------|------|------------|---------------------|-------|-------------|
|       |                     | (ng/g)                   |      |            | (ng/g)              |       |             |
| Ash A | 2,3,7,8-TCDD        | 0.0066                   | ±    | 0.0030     | 0.0032              | ±     | 0.00040     |
|       | 1,2,3,7,8-PeCDD     | 0.021                    | ±    | 0.011      | 0.023               | ±     | 0.0040      |
|       | 1,2,3,4,7,8-HxCDD   | 0.024                    | ±    | 0.012      | 0.016               | ±     | 0.0025      |
|       | 1,2,3,6,7,8-HxCDD   | 0.071                    | ±    | 0.021      | 0.053               | ±     | 0.0056      |
|       | 1,2,3,7,8,9-HxCDD   | 0.049                    | ±    | 0.021      | 0.040               | ±     | 0.0060      |
|       | 1,2,3,4,6,7,8-HpCDD | 1.6                      | ±    | 0.82       | 1.2                 | ±     | 0.067       |
|       | OCDD                | 8.1                      | ±    | 3.3        | 5.1                 | ±     | 0.24        |
|       | 2,3,7,8-TCDF        | 0.014                    | ±    | 0.0064     | 0.010               | ±     | 0.0010      |
|       | 1,2,3,7,8-PeCDF     | 0.039                    | ±    | 0.016      | 0.043               | ±     | 0.0055      |
|       | 2,3,4,7,8-PeCDF     | 0.052                    | ±    | 0.018      | 0.046               | ±     | 0.0050      |
|       | 1,2,3,4,7,8-HxCDF   | 0.10                     | ±    | 0.053      | 0.071               | ±     | 0.0082      |
|       | 1,2,3,6,7,8-HxCDF   | 0.13                     | ±    | 0.045      | 0.093               | ±     | 0.0055      |
|       | 2,3,4,6,7,8-HxCDF   | 0.27                     | ±    | 0.099      | 0.29                | ±     | 0.062       |
|       | 1,2,3,7,8,9-HxCDF   | 0.033                    | ±    | 0.034      | 0.030               | ±     | 0.0010      |
|       | 1,2,3,4,6,7,8-HpCDF | 1.2                      | ±    | 0.34       | 0.75                | ±     | 0.056       |
|       | 1,2,3,4,7,8,9-HpCDF | 0.29                     | ±    | 0.093      | 0.23                | ±     | 0.050       |
|       | OCDF                | 2.7                      | ±    | 0.93       | 2.4                 | ±     | 0.62        |
|       | <b>Total ng/g</b>   | <b>15</b>                | ±    | <b>6.0</b> | <b>10</b>           | ±     | <b>1.15</b> |
| Ash B |                     | Certified concentrations |      |            | Conc. in this study |       |             |
|       |                     | (ng/g)                   |      |            | (ng/g)              |       |             |
|       |                     | 0.021                    | ±    | 0.0050     | 0.024               | ±     | 0.0040      |
|       |                     | 0.11                     | ±    | 0.033      | 0.096               | ±     | 0.0030      |
|       |                     | 0.12                     | ±    | 0.043      | 0.12                | ±     | 0.0090      |
|       |                     | 0.18                     | ±    | 0.064      | 0.14                | ±     | 0.010       |
|       |                     | 0.14                     | ±    | 0.051      | 0.11                | ±     | 0.010       |
|       |                     | 1.6                      | ±    | 0.75       | 1.5                 | ±     | 0.10        |
|       |                     | 5.3                      | ±    | 2.6        | 4.8                 | ±     | 0.31        |
|       |                     | 0.15                     | ±    | 0.043      | 0.14                | ±     | 0.0080      |
|       |                     | 0.34                     | ±    | 0.084      | 0.40                | ±     | 0.022       |
|       |                     | 0.63                     | ±    | 0.17       | 0.66                | ±     | 0.023       |
|       |                     | 0.74                     | ±    | 0.24       | 0.68                | ±     | 0.040       |
|       |                     | 0.88                     | ±    | 0.24       | 0.89                | ±     | 0.010       |
|       |                     | 1.6                      | ±    | 0.59       | 1.8                 | ±     | 0.077       |
|       |                     | 0.20                     | ±    | 0.17       | 0.23                | ±     | 0.012       |
|       |                     | 4.9                      | ±    | 1.7        | 5.0                 | ±     | 0.049       |
|       | 0.62                | ±                        | 0.22 | 0.65       | ±                   | 0.032 |             |
|       | 3.5                 | ±                        | 1.5  | 3.1        | ±                   | 0.11  |             |
|       | <b>Total ng/g</b>   | <b>21</b>                | ±    | <b>8.5</b> | <b>20</b>           | ±     | <b>0.83</b> |

|       | Congeners           | Certified concentrations |           |        | Conc. in this study |           |         |
|-------|---------------------|--------------------------|-----------|--------|---------------------|-----------|---------|
|       |                     | (ng/g)                   |           |        | (ng/g)              |           |         |
| Ash C | 2,3,7,8-TCDD        | 0.0063                   | ±         | 0.0033 | 0.0051              | ±         | 0.00020 |
|       | 1,2,3,7,8-PeCDD     | 0.022                    | ±         | 0.012  | 0.0073              | ±         | 0.0033  |
|       | 1,2,3,4,7,8-HxCDD   | 0.025                    | ±         | 0.013  | 0.018               | ±         | 0.0015  |
|       | 1,2,3,6,7,8-HxCDD   | 0.072                    | ±         | 0.032  | 0.060               | ±         | 0.0055  |
|       | 1,2,3,7,8,9-HxCDD   | 0.048                    | ±         | 0.025  | 0.043               | ±         | 0.0026  |
|       | 1,2,3,4,6,7,8-HpCDD | 1.5                      | ±         | 0.50   | 1.3                 | ±         | 0.062   |
|       | OCDD                | 8.0                      | ±         | 2.8    | 6.2                 | ±         | 0.39    |
|       | 2,3,7,8-TCDF        | 0.014                    | ±         | 0.0071 | 0.0096              | ±         | 0.0010  |
|       | 1,2,3,7,8-PeCDF     | 0.037                    | ±         | 0.014  | 0.033               | ±         | 0.0021  |
|       | 2,3,4,7,8-PeCDF     | 0.054                    | ±         | 0.019  | 0.047               | ±         | 0.0057  |
|       | 1,2,3,4,7,8-HxCDF   | 0.088                    | ±         | 0.034  | 0.080               | ±         | 0.014   |
|       | 1,2,3,6,7,8-HxCDF   | 0.13                     | ±         | 0.042  | 0.10                | ±         | 0.012   |
|       | 2,3,4,6,7,8-HxCDF   | 0.29                     | ±         | 0.10   | 0.28                | ±         | 0.040   |
|       | 1,2,3,7,8,9-HxCDF   | 0.04                     | ±         | 0.032  | 0.036               | ±         | 0.0026  |
|       | 1,2,3,4,6,7,8-HpCDF | 1.2                      | ±         | 0.34   | 0.96                | ±         | 0.092   |
|       | 1,2,3,4,7,8,9-HpCDF | 0.28                     | ±         | 0.10   | 0.30                | ±         | 0.047   |
|       | OCDF                | 2.6                      | ±         | 0.88   | 2.2                 | ±         | 0.20    |
|       |                     | <b>Total ng/g</b>        | <b>14</b> | ±      | <b>5.0</b>          | <b>12</b> | ±       |

**Table 4 - dl-PCBs concentrations in “certified” fly ash samples (13th Intercal); triplicate analysis**

|                   | Congeners         | Certified concentrations |                          |             | Conc. in this study |                     |              |
|-------------------|-------------------|--------------------------|--------------------------|-------------|---------------------|---------------------|--------------|
|                   |                   | (ng/g)                   |                          |             | (ng/g)              |                     |              |
| Ash A             | PCB 81            | 0.0072                   | ±                        | 0.0087      | 0.0019              | ±                   | 0.0015       |
|                   | PCB 77            | 0.023                    | ±                        | 0.022       | 0.015               | ±                   | 0.0026       |
|                   | PCB 123           | 0.0067                   | ±                        | 0.0054      | 0.0069              | ±                   | 0.00070      |
|                   | PCB 118           | 0.094                    | ±                        | 0.098       | 0.14                | ±                   | 0.010        |
|                   | PCB 114           | 0.0081                   | ±                        | 0.0077      | 0.0097              | ±                   | 0.00070      |
|                   | PCB 105           | 0.035                    | ±                        | 0.031       | 0.074               | ±                   | 0.015        |
|                   | PCB 126           | 0.012                    | ±                        | 0.008       | 0.013               | ±                   | 0.0021       |
|                   | PCB 167           | 0.013                    | ±                        | 0.012       | 0.0092              | ±                   | 0.0018       |
|                   | PCB 156           | 0.025                    | ±                        | 0.023       | 0.017               | ±                   | 0.0037       |
|                   | PCB 157           | 0.0069                   | ±                        | 0.0033      | 0.0057              | ±                   | 0.00090      |
|                   | PCB 169           | 0.009                    | ±                        | 0.0030      | 0.0060              | ±                   | 0.0014       |
|                   | PCB 189           | 0.013                    | ±                        | 0.0047      | 0.0088              | ±                   | 0.0014       |
|                   | <b>Total ng/g</b> | <b>0.25</b>              | ±                        | <b>0.23</b> | <b>0.30</b>         | ±                   | <b>0.042</b> |
|                   | Ash B             | Congeners                | Certified concentrations |             |                     | Conc. in this study |              |
|                   |                   | (ng/g)                   |                          |             | (ng/g)              |                     |              |
| PCB 81            |                   | 0.075                    | ±                        | 0.030       | 0.067               | ±                   | 0.0060       |
| PCB 77            |                   | 0.19                     | ±                        | 0.080       | 0.18                | ±                   | 0.013        |
| PCB 123           |                   | 0.034                    | ±                        | 0.020       | 0.054               | ±                   | 0.0070       |
| PCB 118           |                   | 0.28                     | ±                        | 0.17        | 0.51                | ±                   | 0.023        |
| PCB 114           |                   | 0.030                    | ±                        | 0.020       | 0.059               | ±                   | 0.014        |
| PCB 105           |                   | 0.19                     | ±                        | 0.090       | 0.30                | ±                   | 0.064        |
| PCB 126           |                   | 0.23                     | ±                        | 0.060       | 0.25                | ±                   | 0.015        |
| PCB 167           |                   | 0.070                    | ±                        | 0.030       | 0.070               | ±                   | 0.0060       |
| PCB 156           |                   | 0.16                     | ±                        | 0.059       | 0.16                | ±                   | 0.010        |
| PCB 157           |                   | 0.098                    | ±                        | 0.033       | 0.090               | ±                   | 0.0030       |
| PCB 169           |                   | 0.12                     | ±                        | 0.040       | 0.10                | ±                   | 0.0080       |
| PCB 189           |                   | 0.13                     | ±                        | 0.030       | 0.12                | ±                   | 0.012        |
| <b>Total ng/g</b> | <b>1.6</b>        | ±                        | <b>0.66</b>              | <b>2.0</b>  | ±                   | <b>0.018</b>        |              |
| Ash B             | Congeners         | Certified concentrations |                          |             | Conc. in this study |                     |              |
|                   |                   | (ng/g)                   |                          |             | (ng/g)              |                     |              |
|                   | PCB 81            | 0.0058                   | ±                        | 0.0050      | 0.0045              | ±                   | 0.00080      |
|                   | PCB 77            | 0.019                    | ±                        | 0.014       | 0.017               | ±                   | 0.0011       |
|                   | PCB 123           | 0.0072                   | ±                        | 0.0073      | 0.0061              | ±                   | 0.0014       |
|                   | PCB 118           | 0.095                    | ±                        | 0.099       | 0.12                | ±                   | 0.017        |
|                   | PCB 114           | 0.0062                   | ±                        | 0.0051      | 0.0078              | ±                   | 0.0016       |
|                   | PCB 105           | 0.041                    | ±                        | 0.047       | 0.060               | ±                   | 0.014        |
|                   | PCB 126           | 0.012                    | ±                        | 0.0067      | 0.013               | ±                   | 0.00040      |
|                   | PCB 167           | 0.012                    | ±                        | 0.011       | 0.0094              | ±                   | 0.0011       |
|                   | PCB 156           | 0.023                    | ±                        | 0.020       | 0.024               | ±                   | 0.0013       |

|                   |             |          |             |             |          |              |
|-------------------|-------------|----------|-------------|-------------|----------|--------------|
| PCB 157           | 0.0080      | ±        | 0.0046      | 0.0078      | ±        | 0.0012       |
| PCB 169           | 0.0096      | ±        | 0.0040      | 0.0078      | ±        | 0.0017       |
| PCB 189           | 0.013       | ±        | 0.0052      | 0.0095      | ±        | 0.0020       |
| <b>Total ng/g</b> | <b>0.25</b> | <b>±</b> | <b>0.23</b> | <b>0.29</b> | <b>±</b> | <b>0.044</b> |
